# Supplementary material for: Computations underlying Drosophila photo-taxis, odor-taxis, and multi-sensory integration
Source: eLife journal article supplement (doi:10.7554/elife.06229), 2015-05-06

FIGURE 2 - figure supplement 1

LNP Model Parameters derived from:

First 10 minutes of experiments

Second 10 minutes of experiments

All 20 minutes of experiments

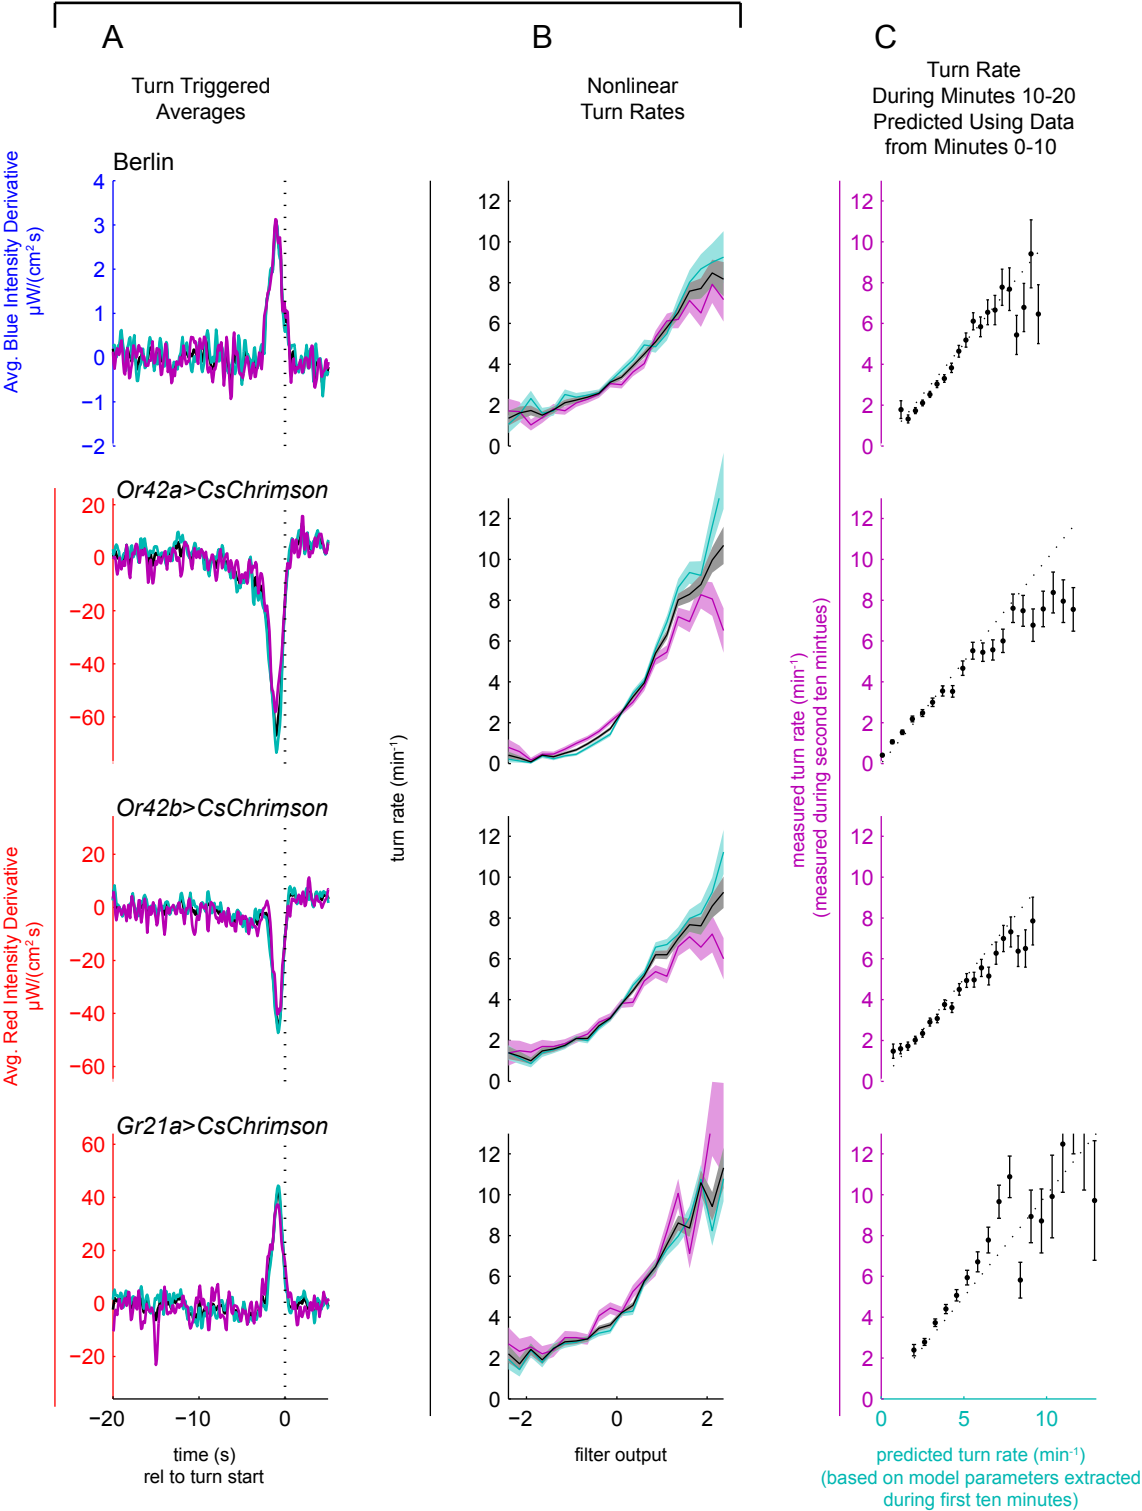

Supplement: supp [file elife-06229-supp-v1.zip]
