# Supplementary figures and images for: Computations underlying Drosophila photo-taxis, odor-taxis, and multi-sensory integration
Source: eLife journal article supplement (doi:10.7554/elife.06229), 2015-05-06

**FIGURE 3 - figure supplement 2**

Early Linear Combination LNP Model

$$r(t) = h(\cos(\theta) x_o(t) + \sin(\theta) x_L(t))$$

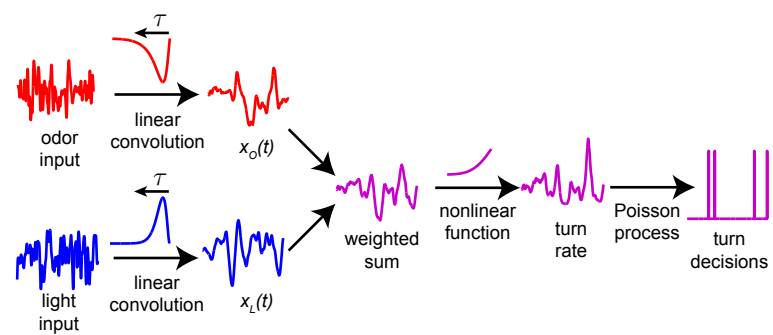

Supplement: supp [file elife-06229-supp-v1.zip]

**FIGURE 3 - figure supplement 1**

Independent Pathways LNP Model

$$r(t) = f(x_o(t)) + g(x_L(t))$$

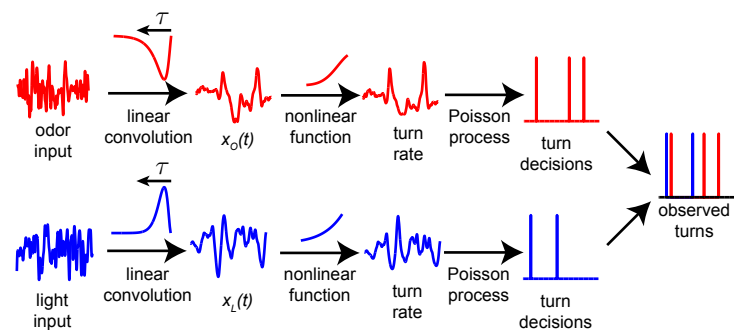

Supplement: supp [file elife-06229-supp-v1.zip]

FIGURE 3 - figure supplement 3

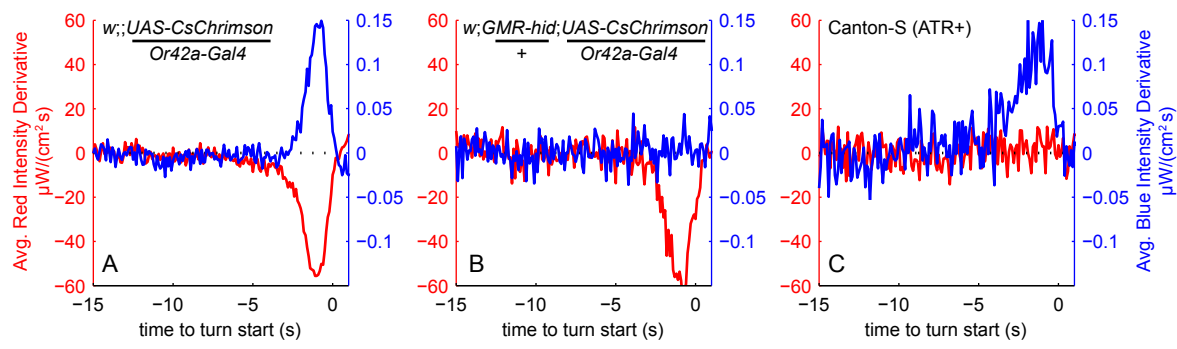

Supplement: supp [file elife-06229-supp-v1.zip]
